# Supplementary material for: A simple check valve for microfluidic point of care diagnostics
Source: Royal Society of Chemistry journal article supplement (doi:10.1039/c6lc01104g), 2016-01-01
Supplement: c6lc01104g1.pdf [file c6lc01104g1.pdf]

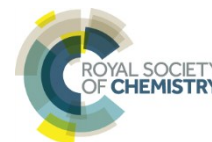

## Lab on a Chip

### ARTICLE

## A simple check valve for microfluidic point of care diagnostics

C. S. Ball,<sup>a†</sup> R. F. Renzi,<sup>a</sup> A. Priye<sup>a</sup> and R. J. Meagher<sup>a†</sup>

<sup>a</sup> Sandia National Laboratories, 7011 East Ave., Livermore, CA, 94550.

† Authors to whom correspondence should be addressed: csball@sandia.gov and rmeaghe@sandia.gov.

### Electronic supplementary information

**Table S1**—Primers and quenching probe used for QUASR RT-LAMP detection of WNV. The underlined nucleotide in the quenching probe is mismatched to the corresponding base in the FIP primer. ROX = 5' carboxy-X-rhodamine NHS ester modification; IBRQ = 3'-Iowa Black RQ quencher modification.

| Primer Name                              | Genome position                   | Sequence                                                   | Source                            |
|------------------------------------------|-----------------------------------|------------------------------------------------------------|-----------------------------------|
| WNV F3                                   | 1028-1046                         | TGGATTGGTTCTCGAAGG                                         | Parida et al., 2004 <sup>15</sup> |
| WNV B3                                   | 1228-1210                         | GGTCAGCACGTTTGTCATT                                        | Parida et al., 2004 <sup>15</sup> |
| WNV FIP-ROX<br>( <u>F1c</u> + TTTT + F2) | 1121-1100 (F1c)<br>1050-1069 (F2) | ROX-TGGCCGCCTCCATATTCATCA + TTTT +<br>CAGCTGCGTGACTATCATGT | Ball et al, 2016 <sup>14</sup>    |
| WNV BIP<br>( <u>B1c</u> + TTTT + B2)     | 1144-1165 (B1)<br>1208-1190 (B2c) | TGCTATTGGCTACCGTCAGCG + TTTT +<br>TGAGCTTCTCCCATGGTCG      | Parida et al., 2004 <sup>15</sup> |
| WNV LF                                   | 1093-1075                         | CATCGATGGTAGGCTTGTC                                        | Parida et al., 2004 <sup>15</sup> |
| WNV LB                                   | 1169-1186                         | TCTCCACCAAAGCTGCGT                                         | Parida et al., 2004 <sup>15</sup> |
| Quencher Name                            |                                   | Sequence                                                   | Source                            |
| WNV FIPc-10m                             | 1112-1121                         | AGGCCGCCAA-IBRQ                                            | Ball et al., 2016 <sup>14</sup>   |

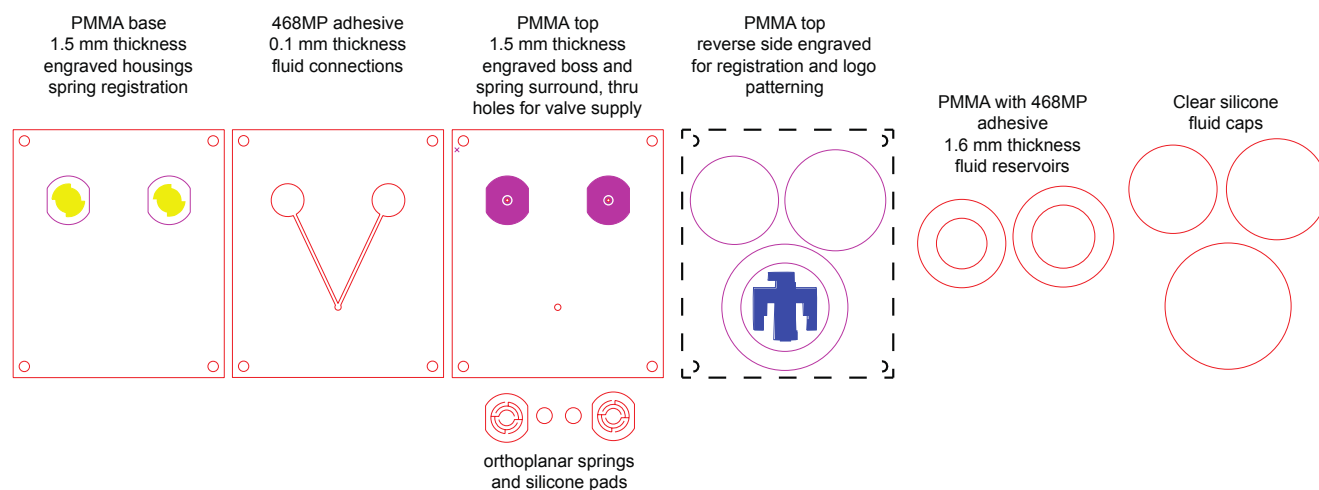

Fig. S1—Schematic for staged reagent delivery device shown in Figure 4A. Solid lines indicate cutting. Shaded areas indicate engraving. Dashed lines indicate that a piece was flipped over for further laser engraving or cutting. Cutting and engraving power correspond to the color used—red is a thru cut, yellow is a deeper feature, and magenta is a surface etch or cut. Features are arranged from left to right in the order of assembly.

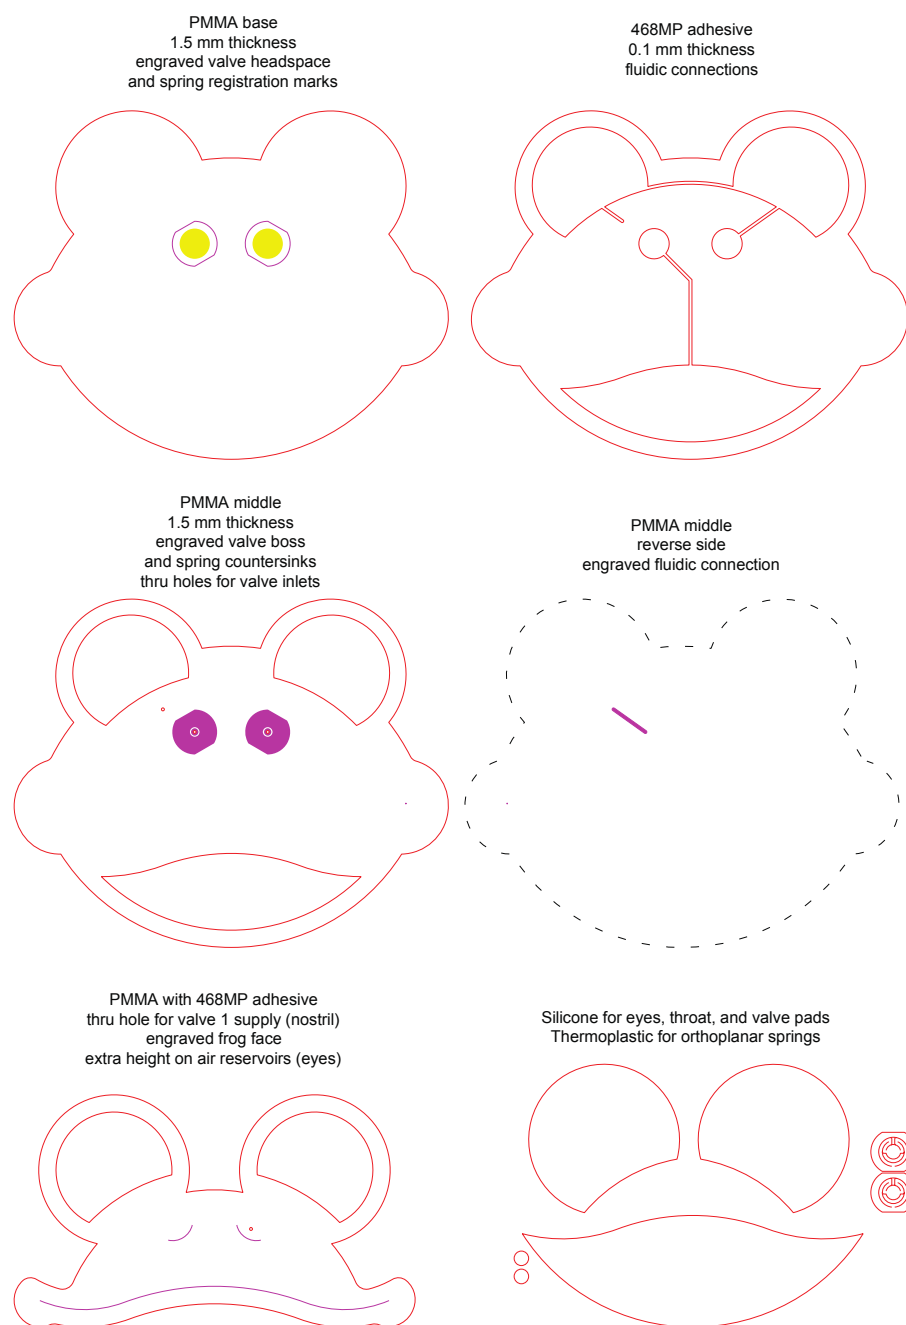

**Figure S2**—Schematic for fluid (air) pumping device, or microfluidic frog, shown in Figure 4B. Solid lines indicate cutting. Shaded areas indicate engraving. Dashed lines indicate that a piece was flipped over for further laser engraving or cutting. Cutting and engraving power correspond to the color used—red is a thru cut, yellow is a deeper feature, and magenta is a surface etch or cut. Features are arranged from left to right in the order of assembly.

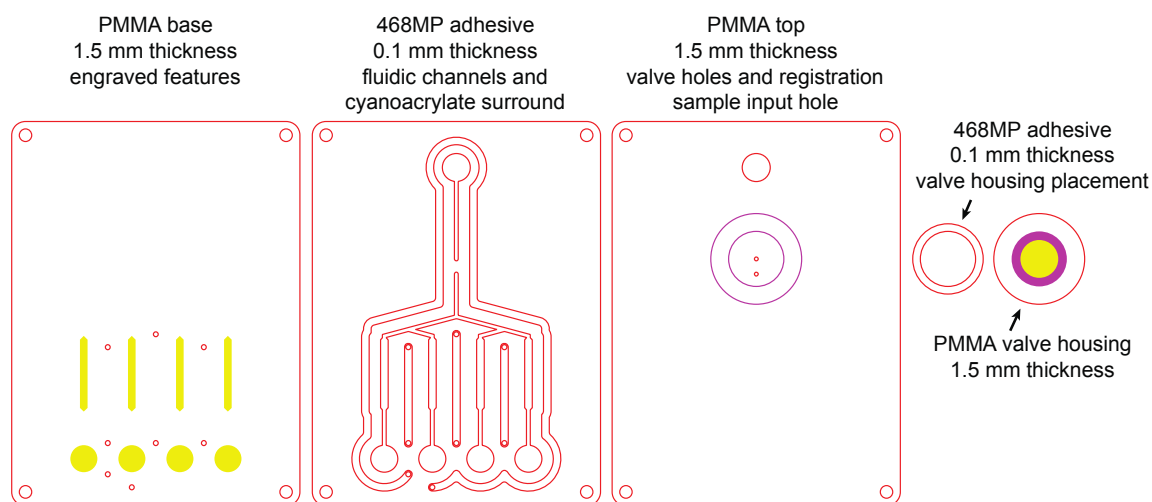

**Figure S3**— Schematic for RT-LAMP chip, shown in Figure 5A-C. Solid lines indicate cutting. Shaded areas indicate engraving. Cutting and engraving power correspond to the color used—red is a thru cut, yellow is a deeper feature, and magenta is a surface etch or cut. Features are arranged from left to right in the order of assembly. Lase cut valve spring not shown on this schematic, but is equivalent to springs in the main article. Cast 10A durometer silicone was used for the elastomer disc.

**Movies 1 (staged delivery) and 2 (pumping microfluidic frog) also uploaded as ESI.**
